# Supplementary material for: Impact of Catheter Ablation on Sleep Quality and Relationship Between Sleep Stability and Recurrence of Paroxysmal Atrial Fibrillation After Successful Ablation: 24‐Hour Holter‐Based Cardiopulmonary Coupling Analysis
Source: PubMed Central journal article supplement — J Am Heart Assoc. 2020 Nov 26;9(23):e017016. doi: 10.1161/JAHA.120.017016 (PMC7763792; doi:10.1161/jaha.120.017016), 2020-11-26
Supplement: JAH3-9-e017016-s001.pdf [file JAH3-9-e017016-s001.pdf]

# **SUPPLEMENTAL MATERIAL**

**Table S1. Subgroup analysis according to sleep status: Sleep status according to the HFC tertile.**

|                                    | H1<br>N = 76 | H2<br>N = 75 | H3<br>N = 74 |
|------------------------------------|--------------|--------------|--------------|
| Age, years                         | 57.38±10.32  | 56.87±11.73  | 58.62±10.87  |
| Height, cm                         | 164.02±8.45  | 167.96±8.62  | 165.54±8.39  |
| Weight, kg                         | 66.46±8.88   | 69.38±9.83   | 67.53±9.73   |
| BMI, kg/m <sup>2</sup>             | 24.66±2.32   | 24.57±2.88   | 24.61±2.85   |
| AF duration, day                   | 384.73±75.59 | 431.25±75.26 | 537.51±96.31 |
| CHA2DS2VASc                        | 1.78±1.22    | 1.39±1.36    | 1.55±1.26    |
| CHF, n (%)                         | 6 (8.1)      | 5 (6.7)      | 10 (13.2)    |
| HTN, n (%)                         | 38 (51.4)    | 38 (50.7)    | 28 (36.8)    |
| Age (>75), n (%)                   | 2 (2.7)      | 2 (2.7)      | 2 (2.6)      |
| DM, n (%)                          | 15 (20.3)    | 11 (14.7)    | 16 (21.1)    |
| Stroke, n (%)                      | 5 (6.8)      | 3 (4)        | 6 (7.9)      |
| TIA, n (%)                         | 2 (2.7)      | 3 (4)        | 0            |
| Vascular disease, n (%)            | 0            | 0            | 1 (1.3)      |
| Age (65-75), n (%)                 | 15 (20.3)    | 19 (25.3)    | 22 (28.9)    |
| Male, %                            | 34 (45.9)    | 60 (80.0)    | 51 (67.1)    |
| CT                                 |              |              |              |
| LA volume, mL                      | 116.27±23.59 | 118.70±26.76 | 122.49±30.01 |
| Echocardiography                   |              |              |              |
| LV Ejection Fraction, %            | 67.48±6.96   | 66.44±8.53   | 65.95±6.78   |
| LA volume index, mL/m <sup>2</sup> | 32.36±14.15  | 30.19±14.5   | 34.42±15.54  |
| Sleep parameter                    |              |              |              |
| HFC, %                             | 49.37±8.36   | 28.55±4.22   | 11.60±5.97   |
| LFC, %                             | 29.22±9.44   | 43.04±10.55  | 51.30±12.02  |
| VFLC, %                            | 20.24±6.35   | 26.19±8.85   | 32.52±9.31   |
| NB, %                              | 1.11±2.72    | 2.78±4.23    | 2.24±4.70    |
| BB, %                              | 15.12±8.23   | 23.54±8.88   | 31.22±12.63  |
| Recurrence                         | 15 (20.3)    | 13 (17.3)    | 8 (10.5)     |

Values are presented as mean ± SD or number (%).

RFCA, radio-frequency catheter ablation; LFC, low frequency coupling; BMI, body mass index; CHF, congestive heart failure; TIA, transient ischemic attack; LA, left atrium; LAA, left atrial appendage; RA, right atrium; LV, left ventricle; HFC, high-frequency coupling; VLFC, very low frequency coupling; NB, narrow band; BB, broadband.

**Table S2. Subgroup analysis according to sleep status: Sleep status according to the LFC tertile.**

|                                    | L1<br>N = 75 | L2<br>N = 76 | L3<br>N = 74  |
|------------------------------------|--------------|--------------|---------------|
| Age, years                         | 57.93±11.27  | 56.28±11.52  | 58.70±10.04   |
| Height, cm                         | 164.32±8.66  | 166.06±9.63  | 167.17±7.18   |
| Weight, kg                         | 66.44±8.87   | 68.68±9.75   | 68.27±9.90    |
| BMI, kg/m <sup>2</sup>             | 24.56±2.24   | 24.93±3.18   | 24.34±2.55    |
| AF duration, day                   | 314.23±62.65 | 466.72±75.85 | 576.04±104.45 |
| CHA2DS2VASc                        | 1.75±1.23    | 1.51±1.38    | 1.46±1.24     |
| CHF, n (%)                         | 9 (12.0)     | 5 (6.6)      | 7 (9.5)       |
| HTN, n (%)                         | 37 (49.3)    | 40 (52.6)    | 27 (36.5)     |
| Age (>75), n (%)                   | 2 (2.7)      | 2 (2.6)      | 2 (2.7)       |
| DM, n (%)                          | 14 (18.7)    | 14 (18.4)    | 14 (18.9)     |
| Stroke, n (%)                      | 4 (5.3)      | 4 (5.3)      | 6 (8.1)       |
| TIA, n (%)                         | 1 (1.3)      | 1 (1.3)      | 3 (4.1)       |
| Vascular disease, n (%)            |              |              | 1 (1.4)       |
| Age (65-75), n (%)                 | 19 (25.3)    | 18 (23.7)    | 19 (25.7)     |
| Male, %                            | 37 (49.3)    | 52 (68.4)    | 56 (75.7)     |
| <b>CT</b>                          |              |              |               |
| LA volume, mL                      | 119.18±27.26 | 120.66±24.00 | 117.61±29.63  |
| <b>Echocardiography</b>            |              |              |               |
| LV Ejection Fraction, %            | 65.95±9.06   | 67.66±6.85   | 66.28±5.97    |
| LA volume index, mL/m <sup>2</sup> | 31.83±15.44  | 33.42±13.11  | 31.88±15.75   |
| <b>Sleep parameter</b>             |              |              |               |
| HFC, %                             | 44.16±14.66  | 28.54±11.36  | 16.15±10.33   |
| LFC, %                             | 25.70±6.64   | 41.41±4.37   | 56.95±6.55    |
| VLFC, %                            | 27.00±10.29  | 27.65±10.01  | 24.43±8.37    |
| NB, %                              | 0.66±2.24    | 1.72±2.75    | 3.79±5.63     |
| BB, %                              | 11.93±5.75   | 24.11±6.58   | 34.19±10.64   |
| Recurrence                         | 11 (14.7)    | 18 (23.7)    | 7 (9.5)       |

Values are presented as mean ± SD or number (%).

RFCA, radio-frequency catheter ablation; LFC, low frequency coupling; BMI, body mass index; CHF, congestive heart failure; TIA, transient ischemic attack; LA, left atrium; LAA, left atrial appendage; RA, right atrium; LV, left ventricle; HFC, high-frequency coupling; VLFC, very low frequency coupling; NB, narrow band; BB, broadband.
